# Supplementary material for: A Low Affinity GCaMP3 Variant (GCaMPer) for Imaging the Endoplasmic Reticulum Calcium Store
Source: PubMed Central journal article supplement (PMC4599735; doi:10.1371/journal.pone.0139273), 2015-10-09

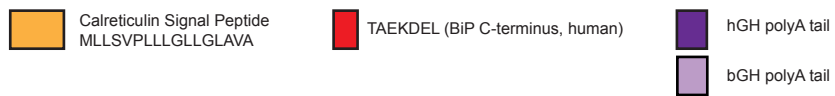**ADDGENE #**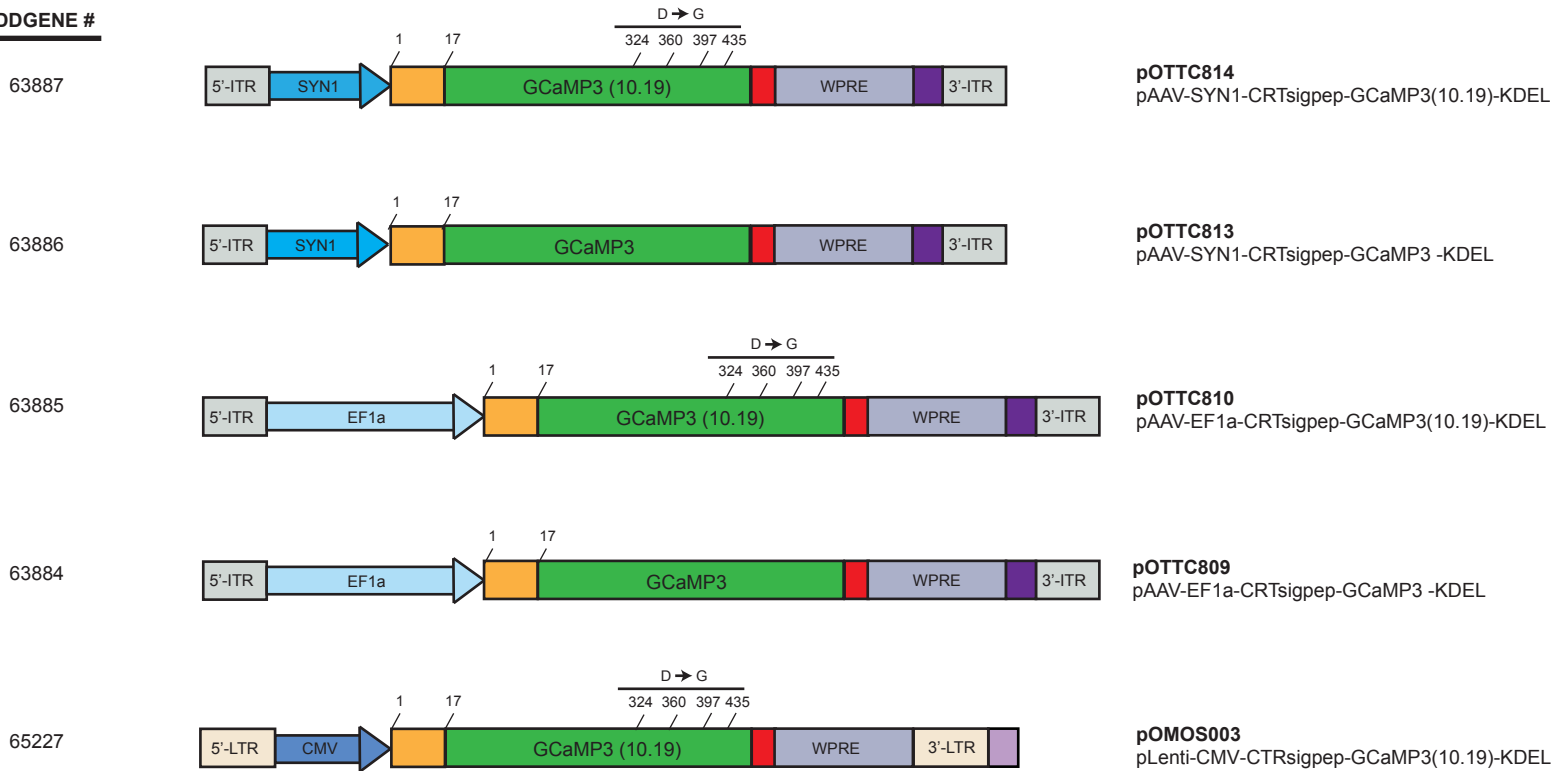

Supplement: pone.0139273.s001.pdf [file pone.0139273.s001.pdf]
